# Supplementary material for: Synuclein impairs trafficking and signaling of BDNF in a mouse model of Parkinson’s disease
Source: PubMed Central journal article supplement (PMC5478665; doi:10.1038/s41598-017-04232-4), 2017-06-20

## **Synuclein impairs trafficking and signaling of BDNF in a mouse model of Parkinson's disease**

Fang Fang<sup>1,2</sup>, Wanlin Yang<sup>1,2</sup>, Jazmin B. Florio<sup>2</sup>, Edward Rockenstein<sup>2</sup>, Brian Spencer<sup>2</sup>, Xavier M. Orain<sup>2</sup>, Stephanie X. Dong<sup>2</sup>, Huayan Li<sup>2</sup>, Xuqiao Chen<sup>2</sup>, Kijung Sung<sup>2</sup>, Robert A. Rissman<sup>2,3</sup>, Eliezer Masliah<sup>2</sup>, Jianqing Ding<sup>1</sup>, Chengbiao Wu<sup>2</sup>

<sup>1</sup>Institute of Neurology and Department of Neurology, Ruijin Hospital, Shanghai Jiao Tong University School of Medicine, Shanghai, China

<sup>2</sup>Department of Neurosciences, University of California San Diego, La Jolla, California, USA

<sup>3</sup>VA San Diego Healthcare System, San Diego, CA

### **Corresponding authors**

#### **Jianqing Ding, PhD**

Department of Neurology & Institute of Neurology,  
Ruijin Hospital,  
Shanghai Jiaotong University School of Medicine,  
197 Ruijin Er Rd., Building #11, Room #1205,  
Shanghai, China 200025

Email: [jqding18@163.com](mailto:jqding18@163.com)

Tel: 011.86.213.418.6594

#### **Chengbiao Wu, PhD**

Department of Neurosciences  
University of California San Diego  
Medical Teaching Facility, Room 312 MC-0624  
9500 Gilman Drive, La Jolla, CA 92093-0624

Email: [chw049@ucsd.edu](mailto:chw049@ucsd.edu)

Tel: 1-858-534-0996

## **Supplemental Information**

All original immunoblots that correspond to those in the text are marked and presented below. When possible, full size uncut blots are shown. We also include multiple exposures in the Supplementary Information file for Figure 3E.

FIG 2A

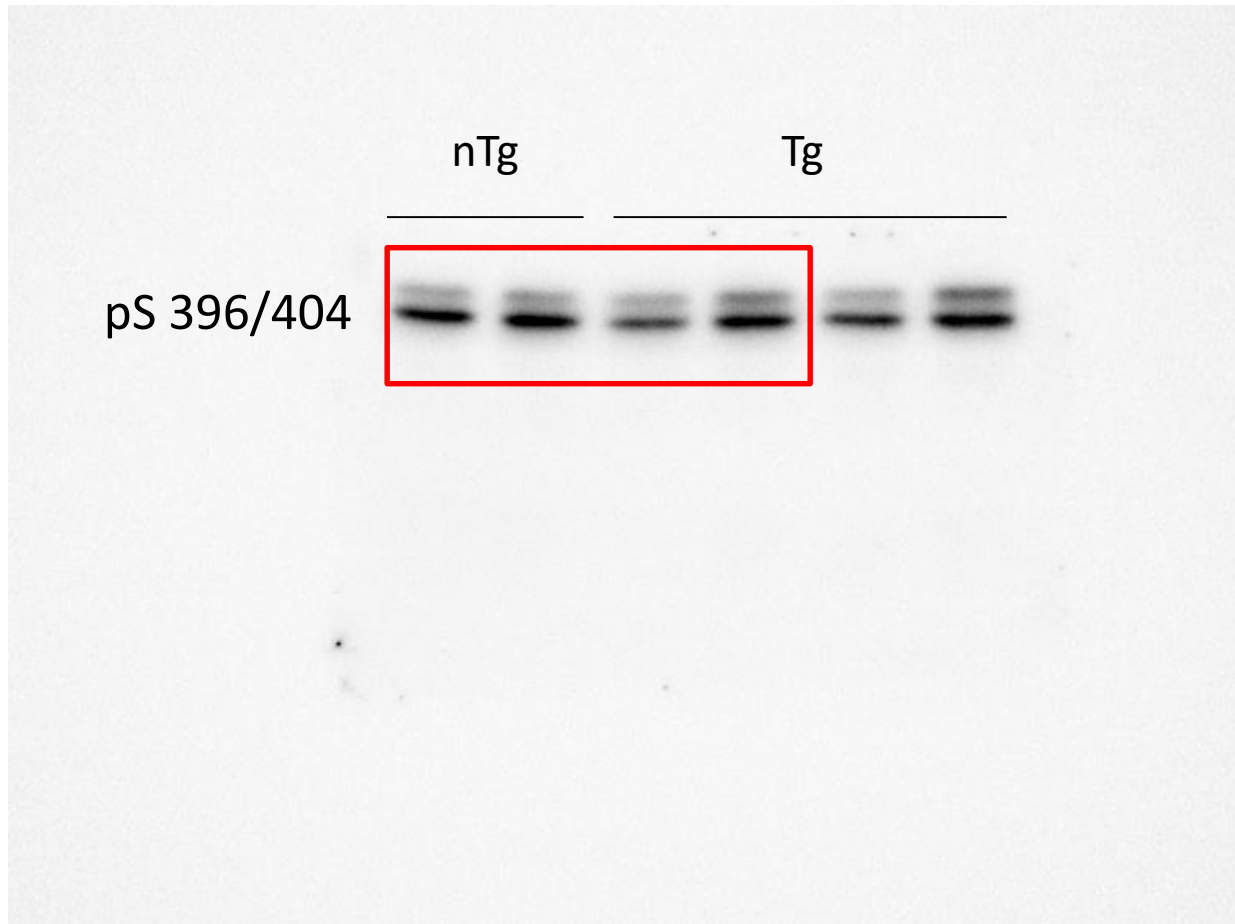



FIG 2A

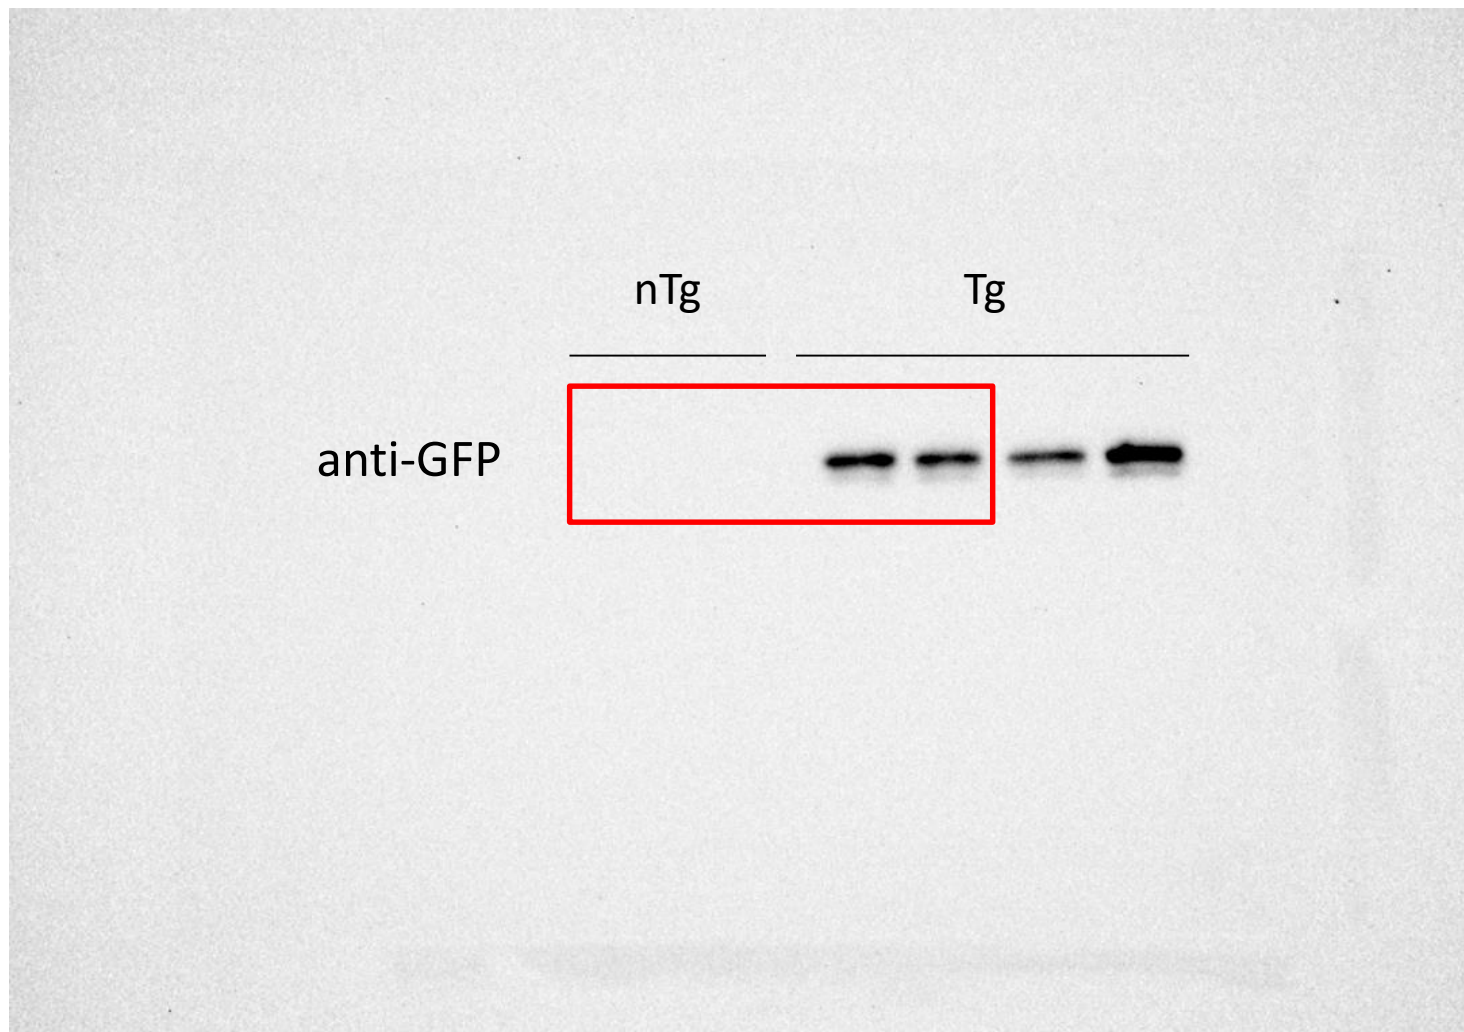

FIG 2A

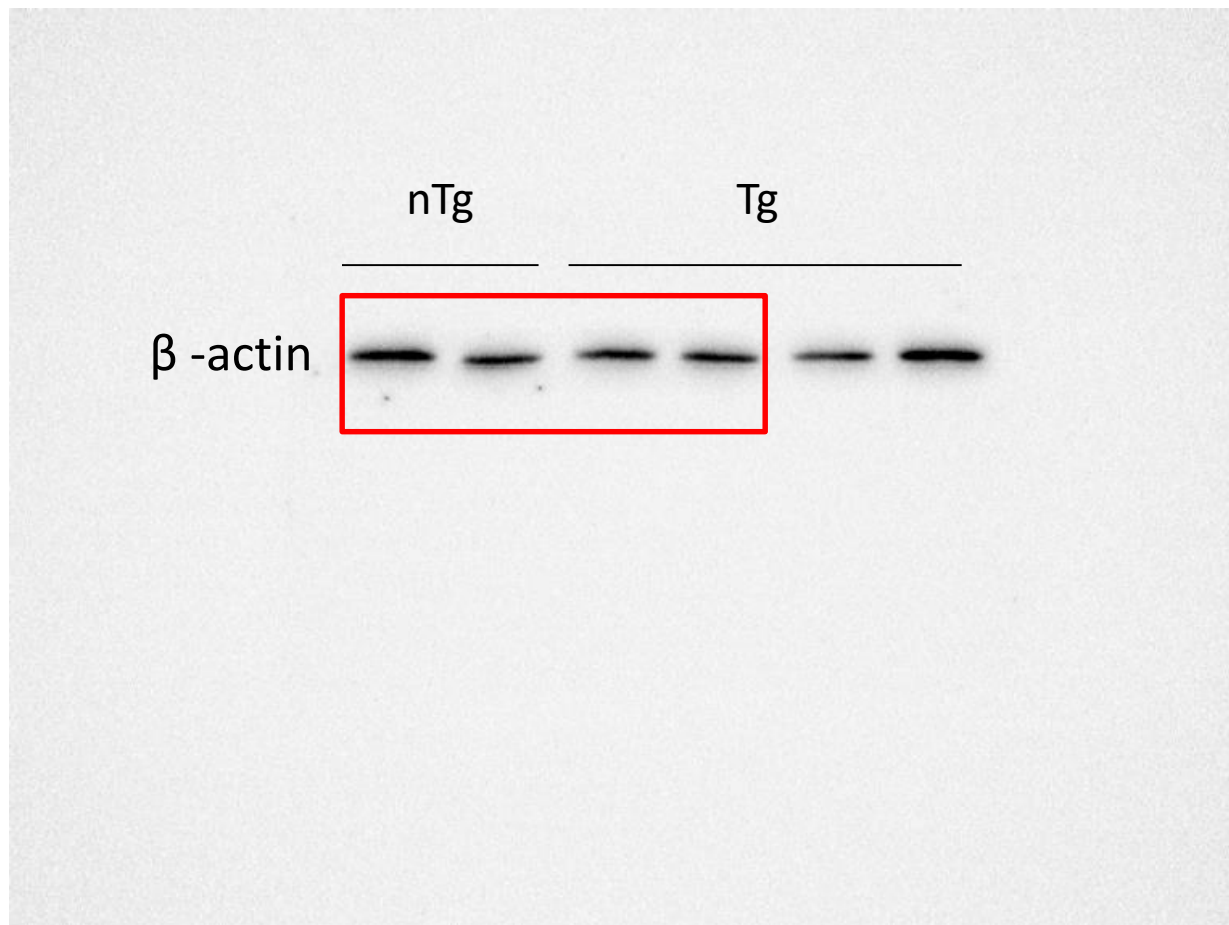

FIG 2B

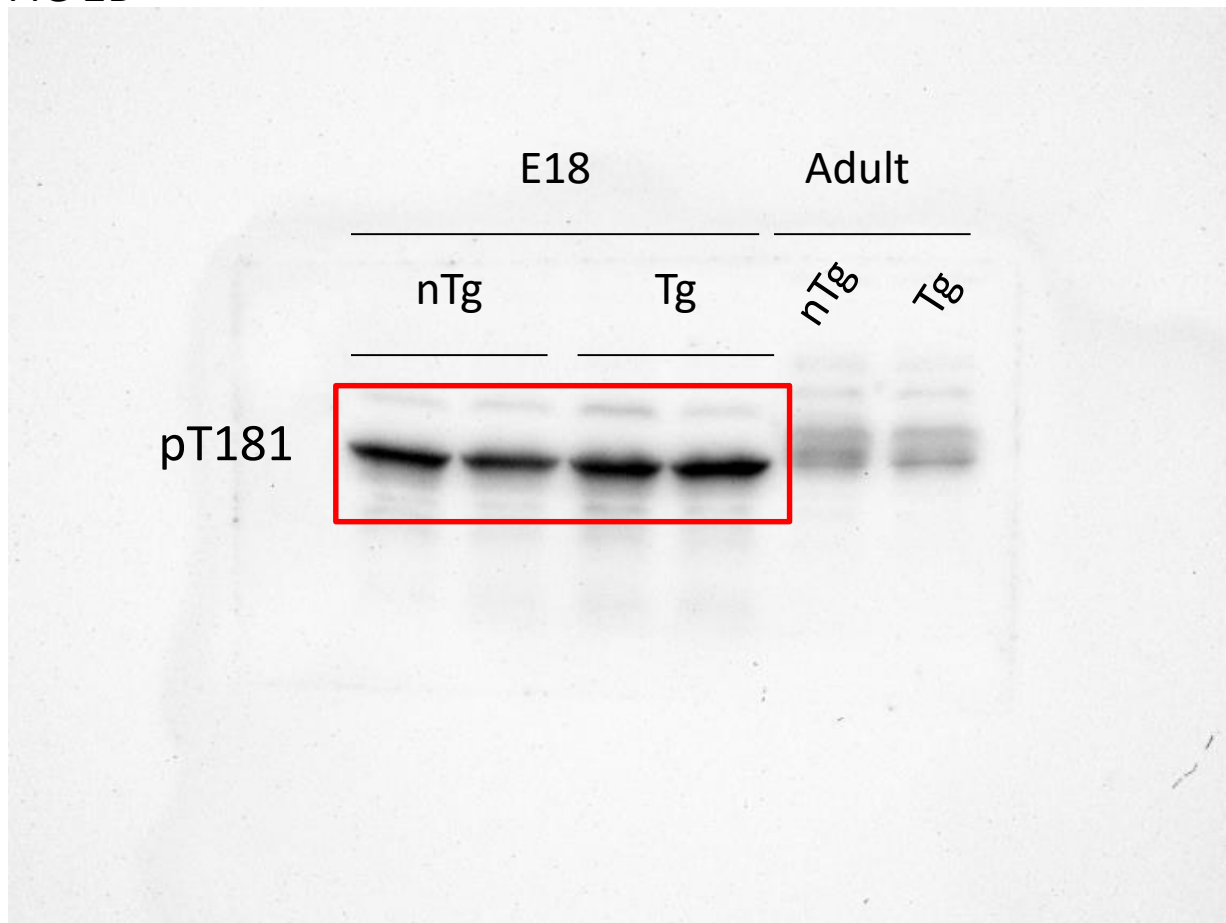

FIG 2B

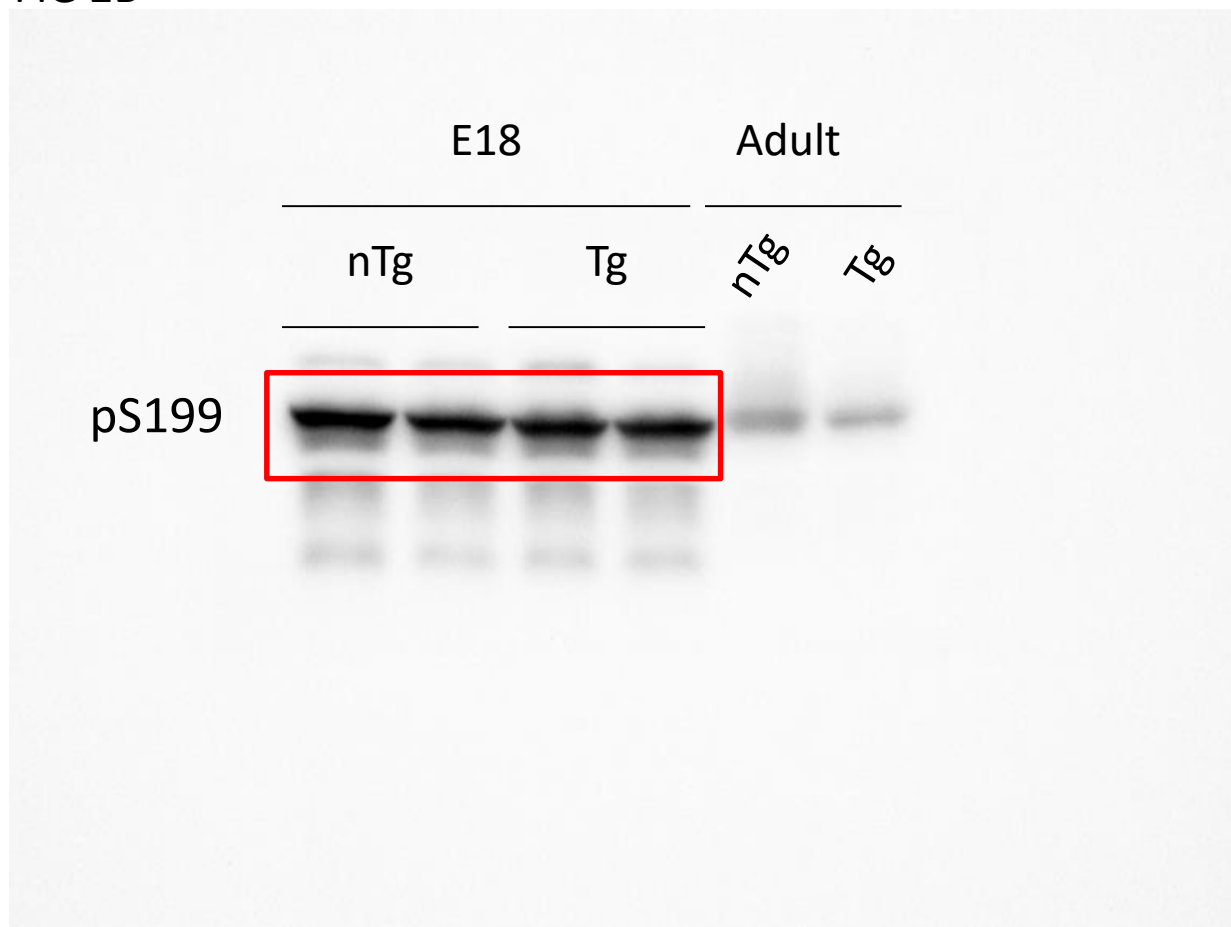



FIG 2B

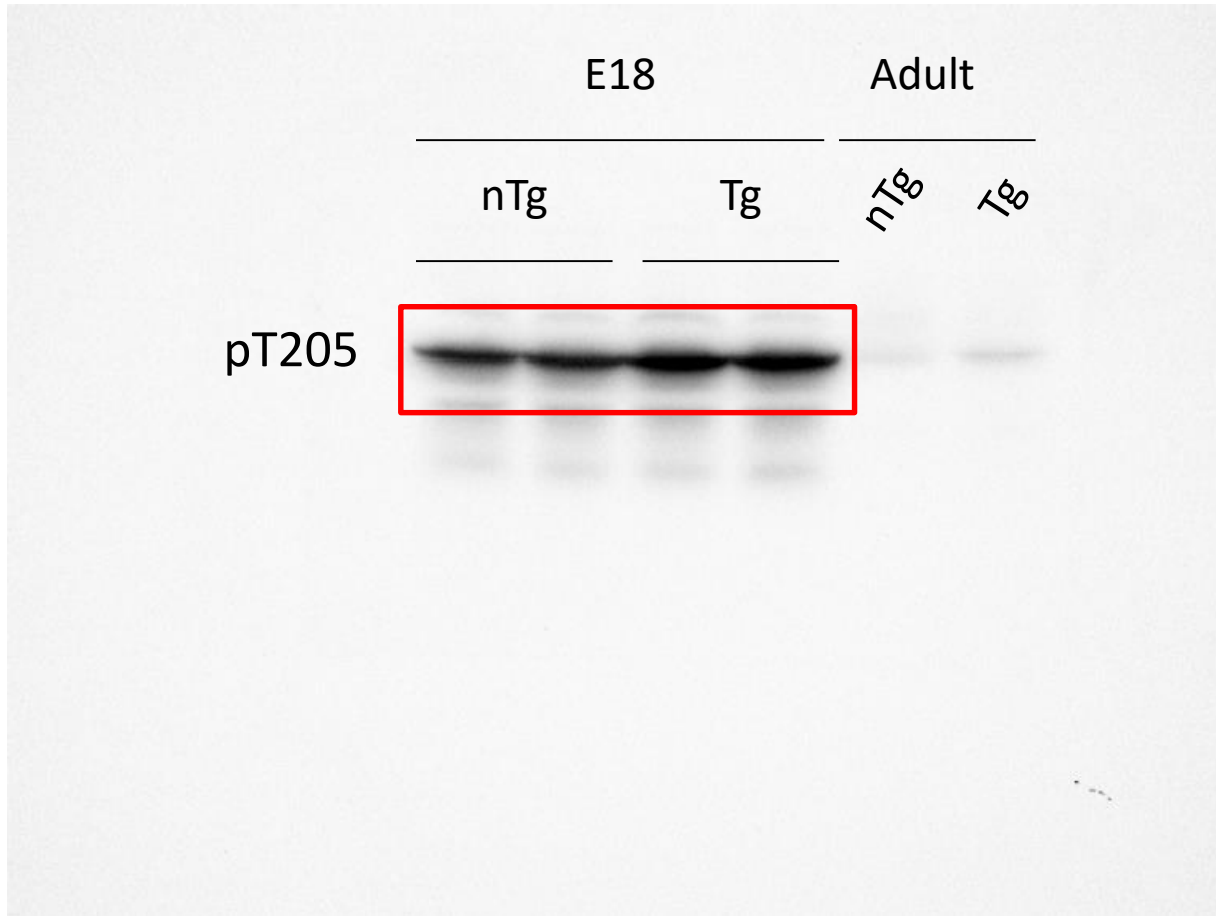

FIG 2B

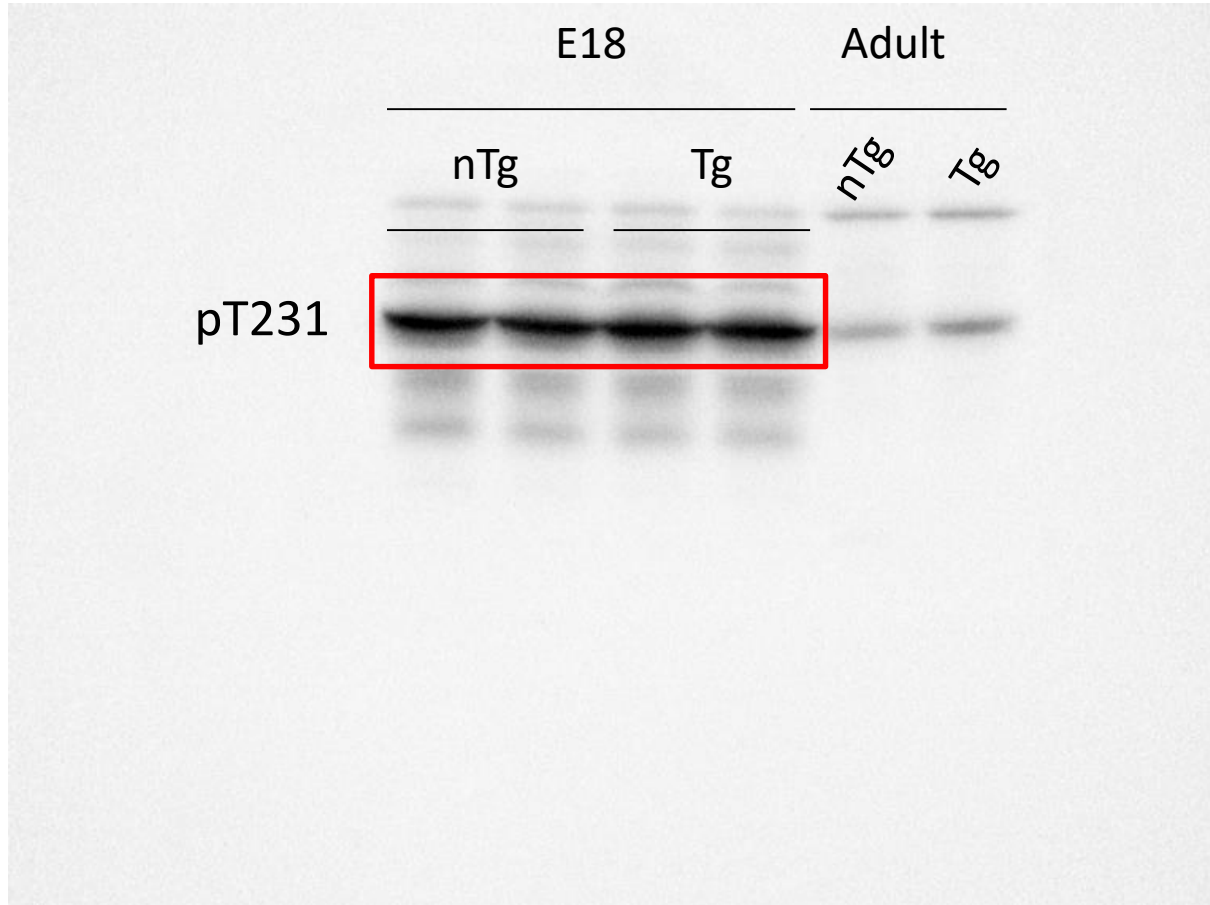

FIG 2B

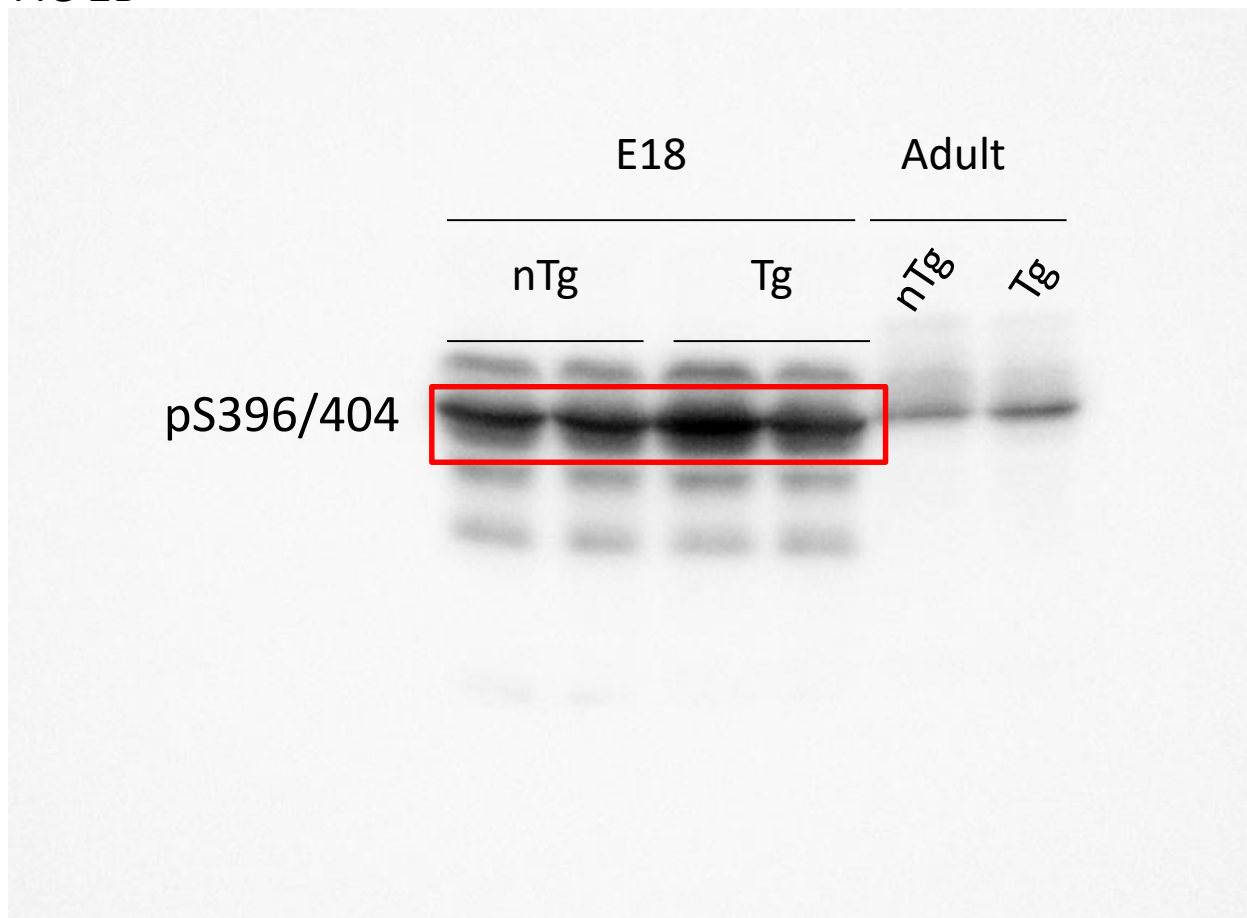

FIG 2B

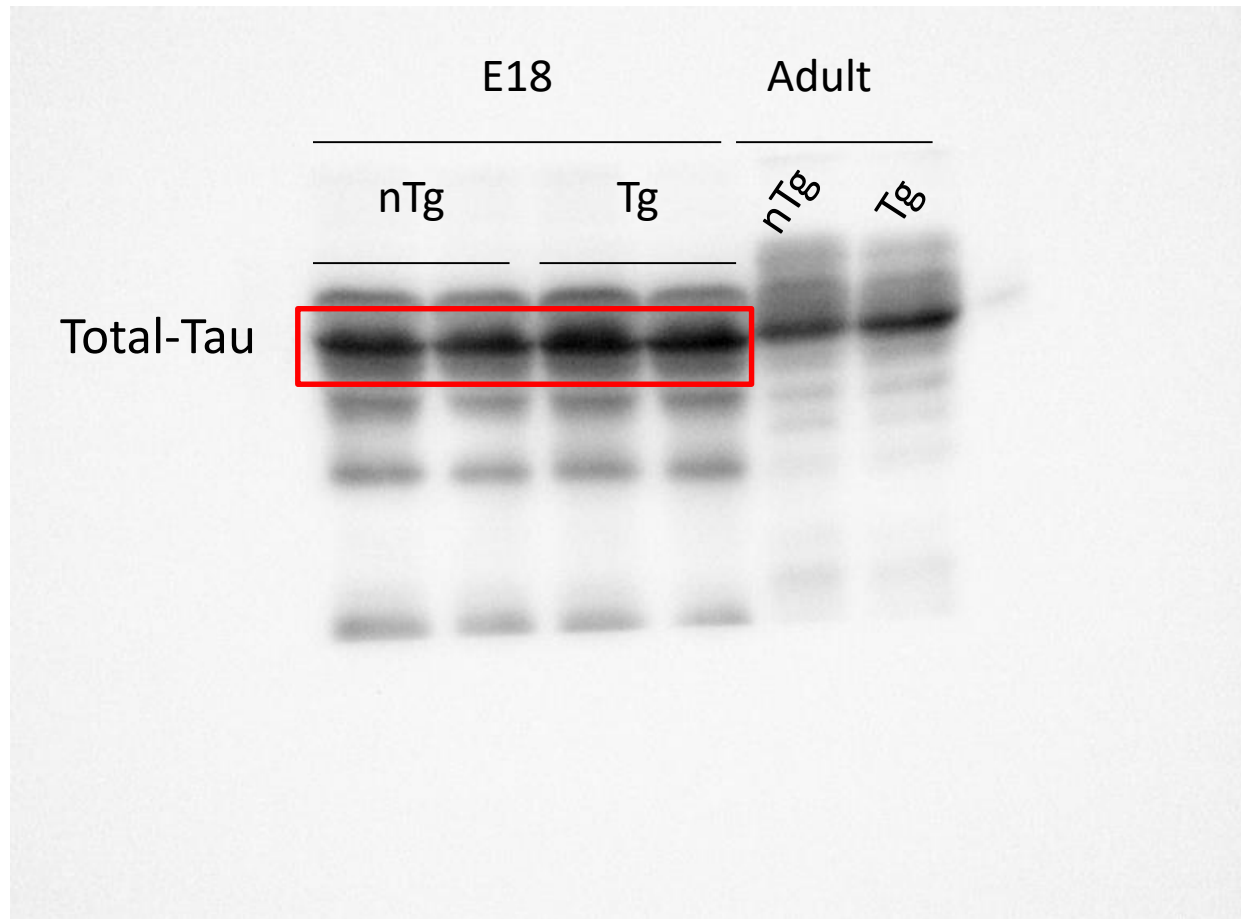

FIG 2B

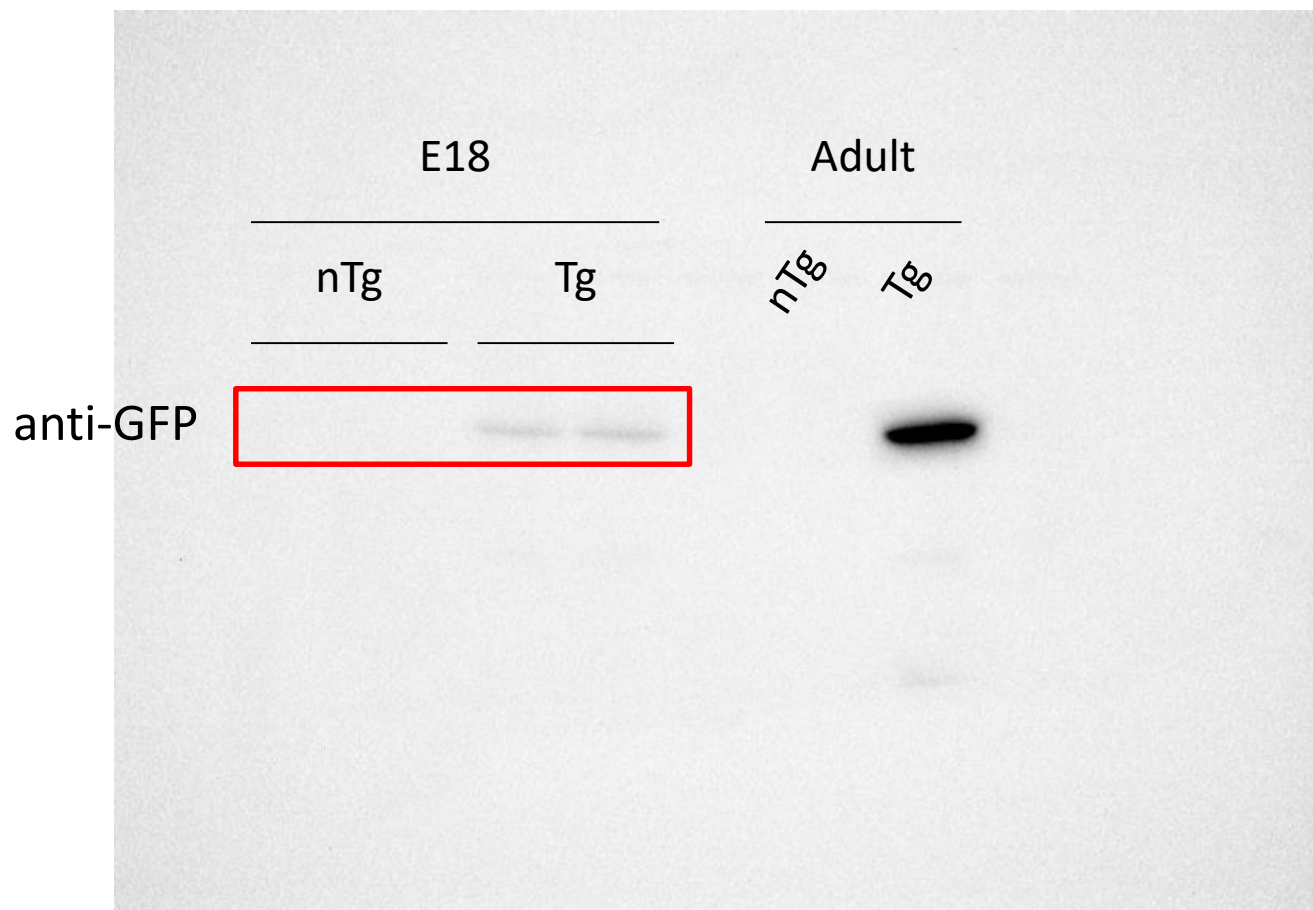

FIG 2B

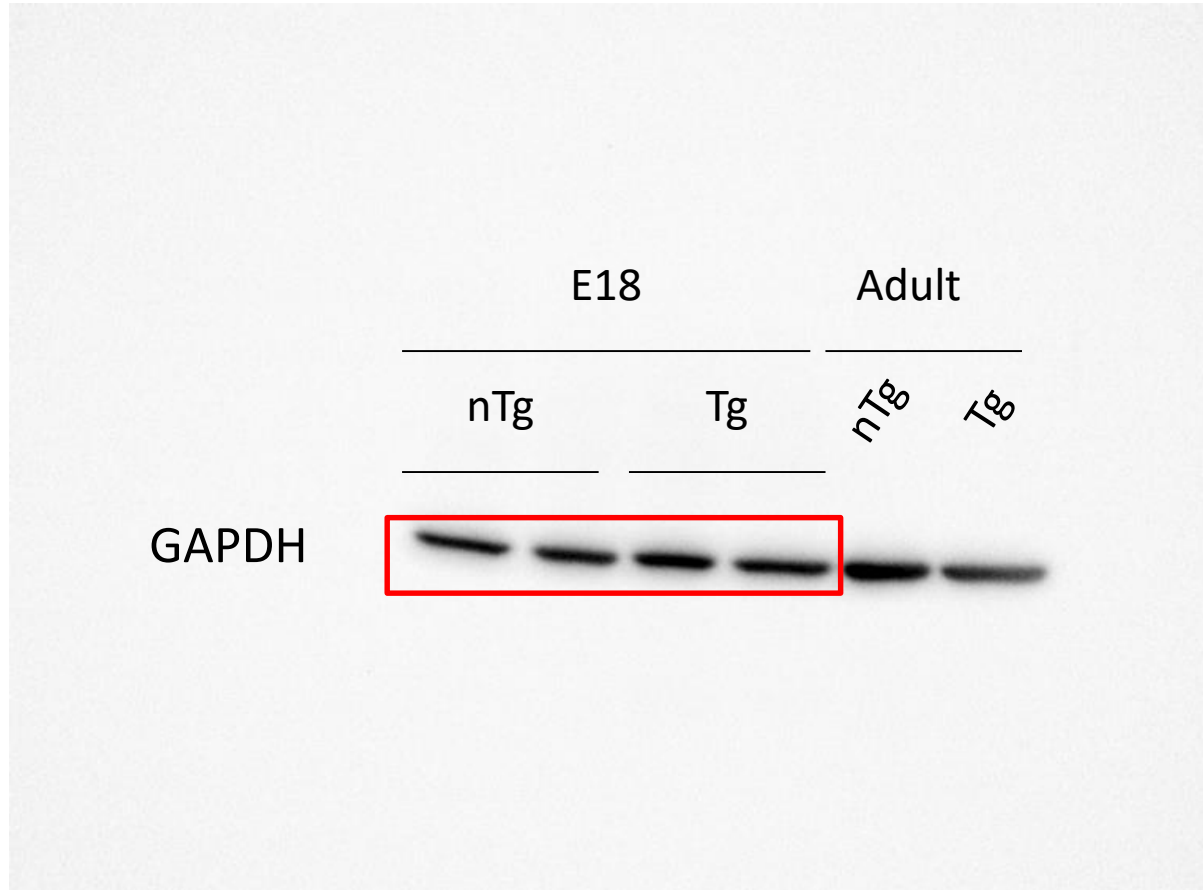

FIG 3A

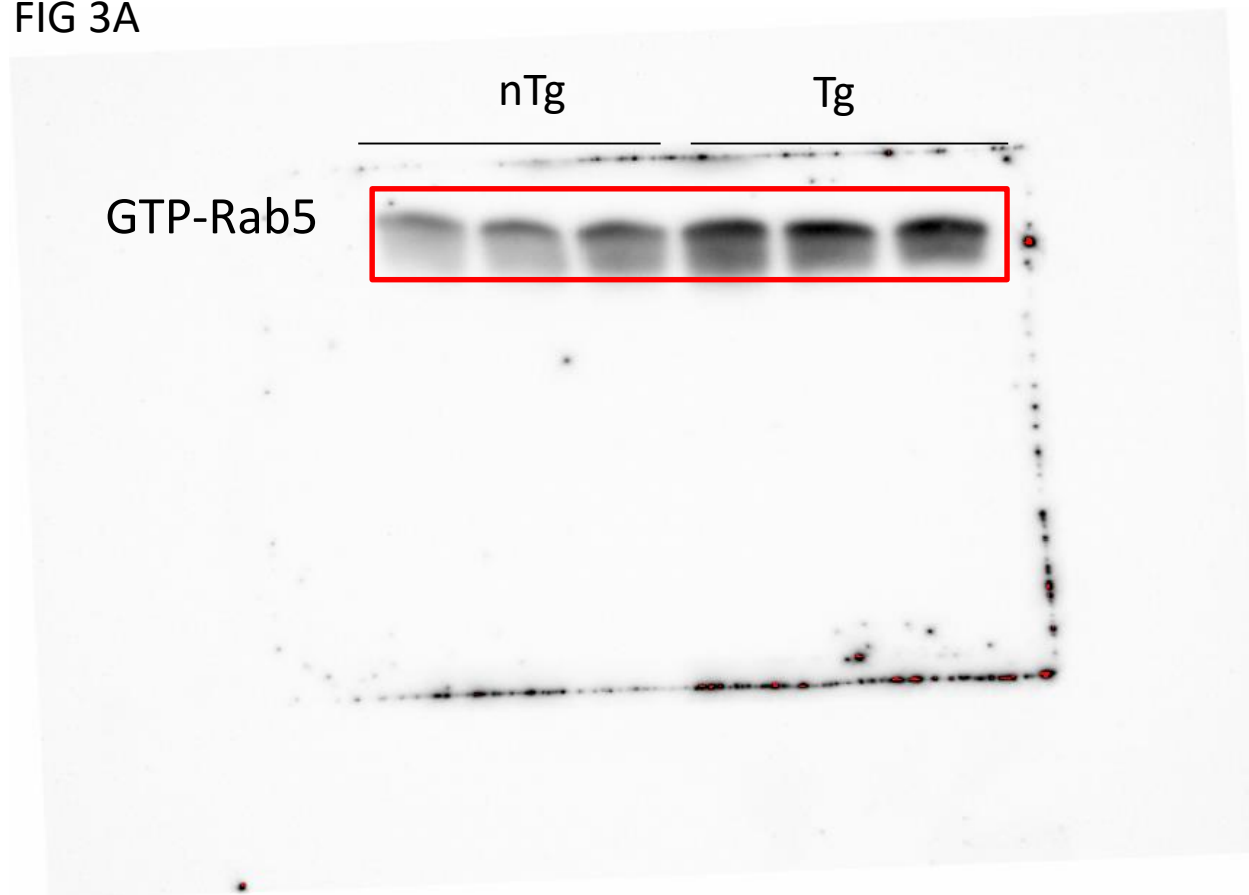

FIG 3A

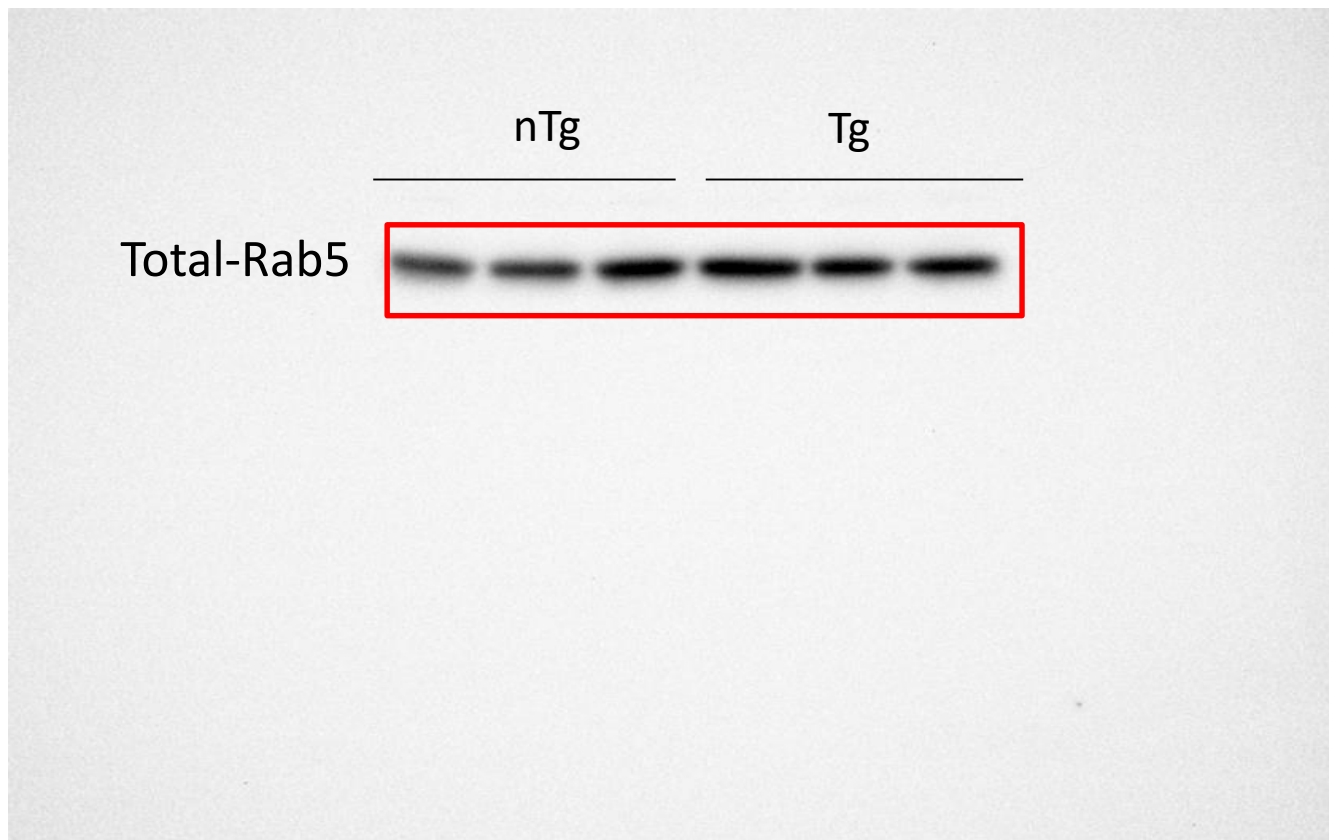



FIG 3A

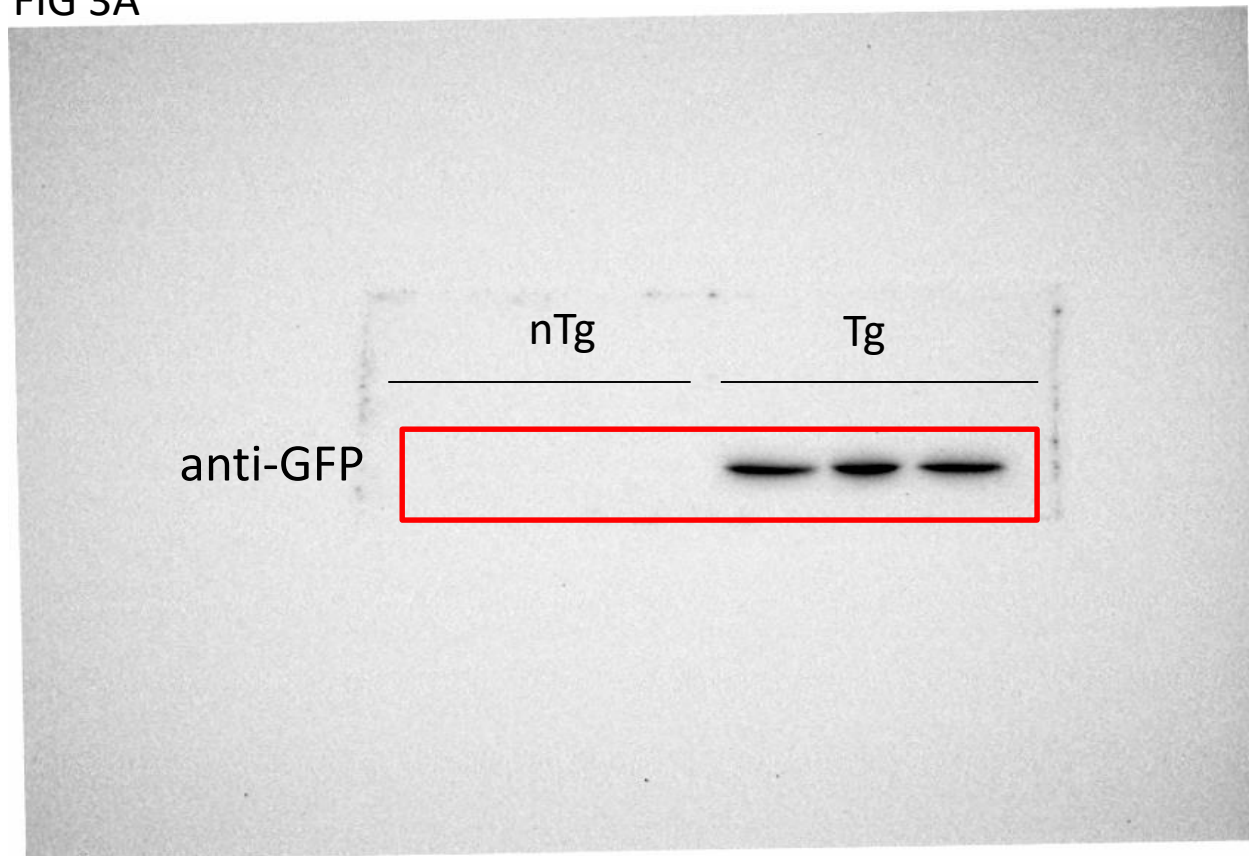

FIG 3A

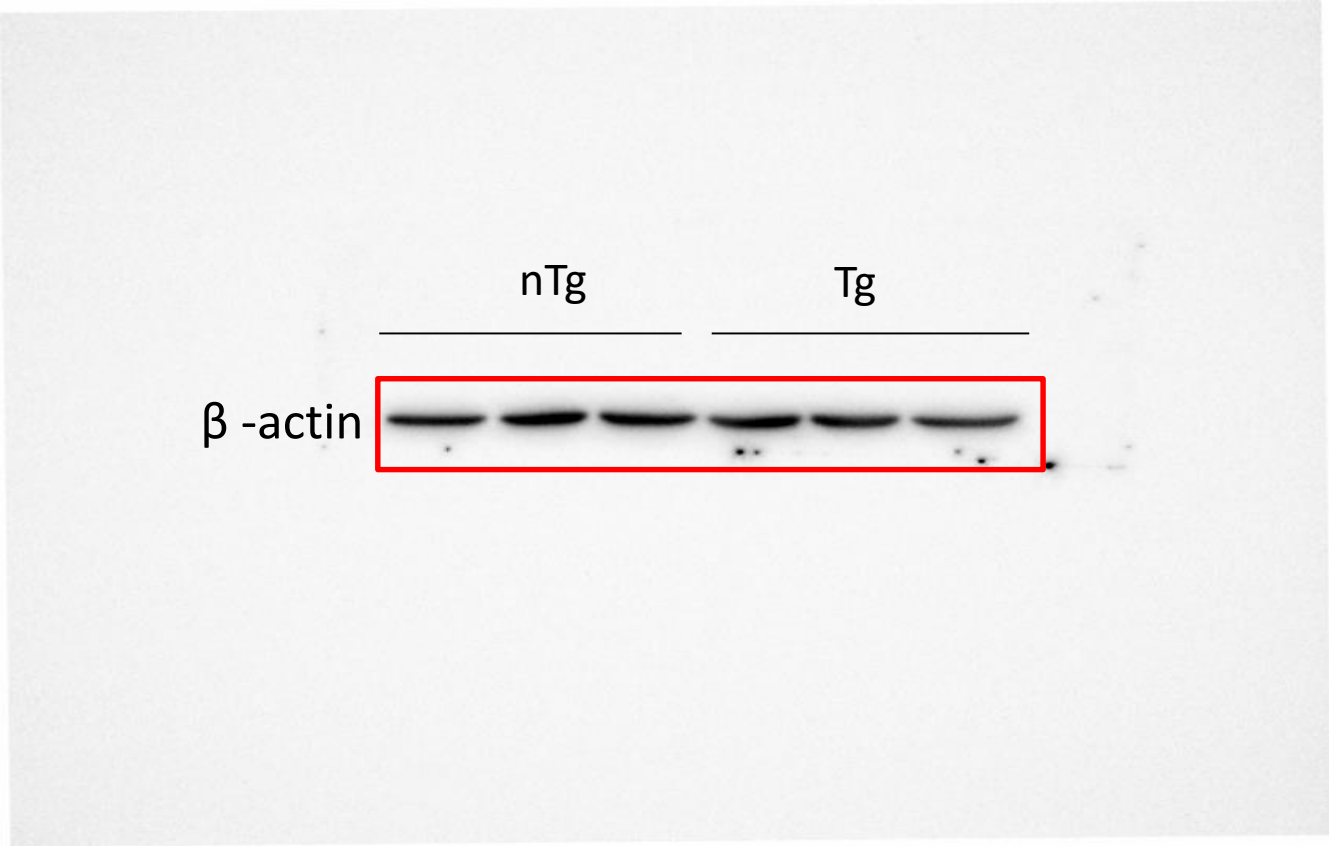

FIG 3C

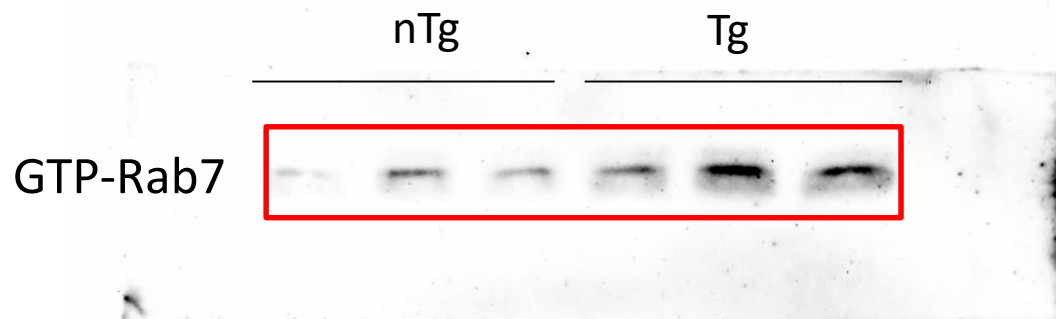

FIG 3C

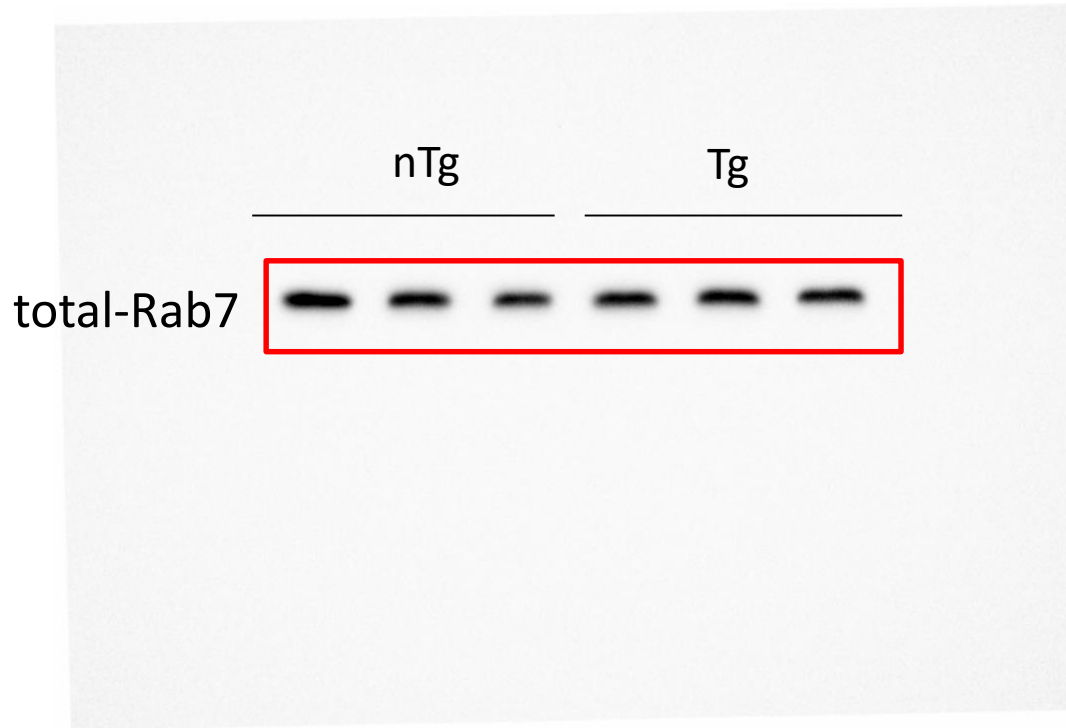

FIG 3C

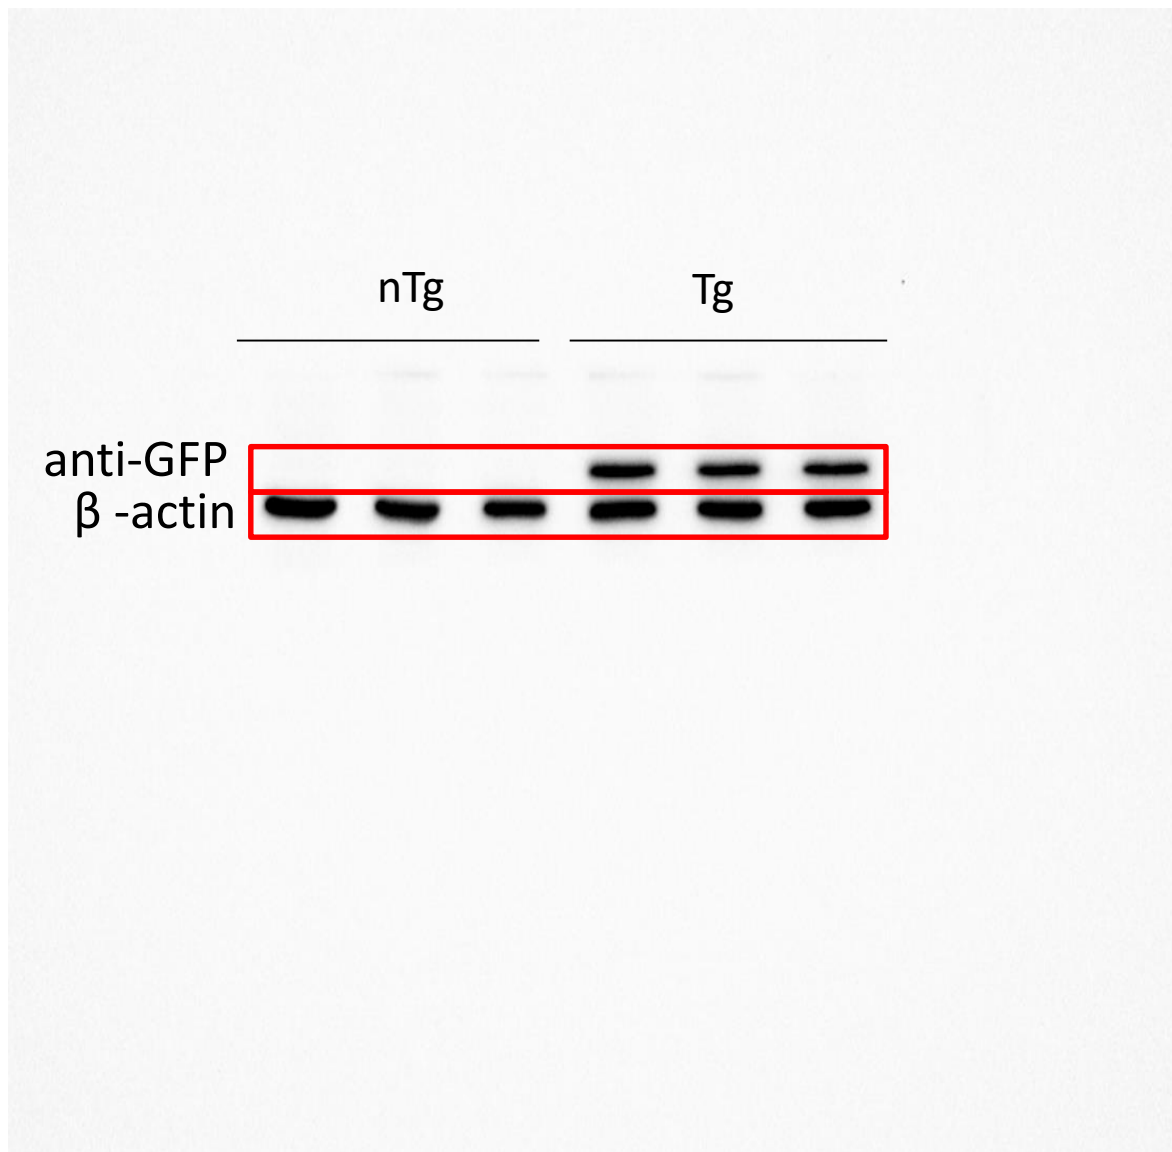

FIG 3E

DIC

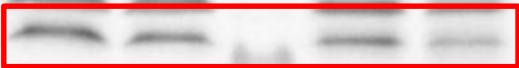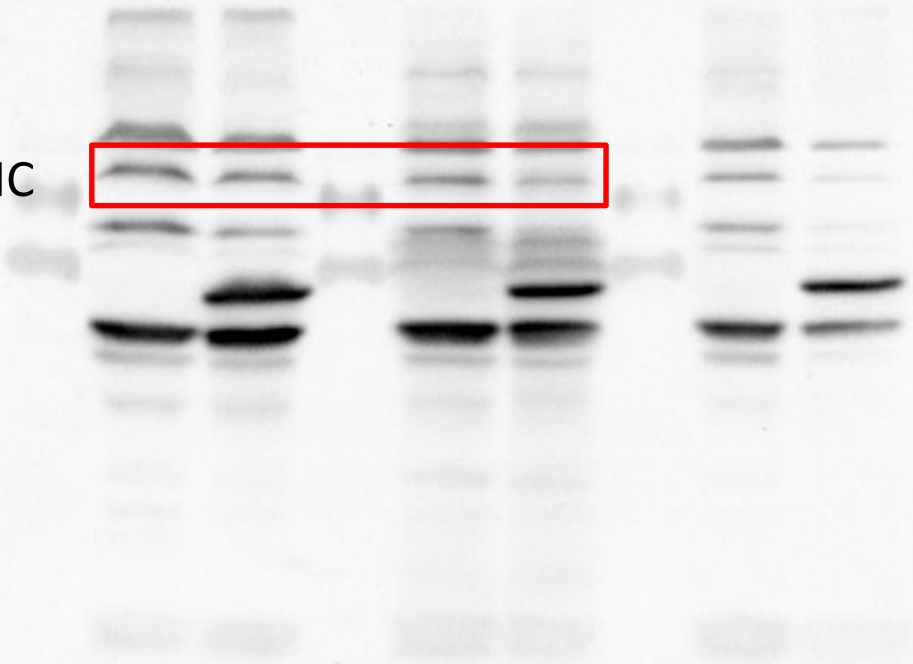

FIG 3E

GFP-ASYN

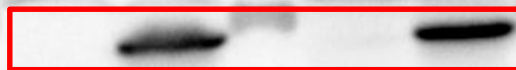

FIG 3E

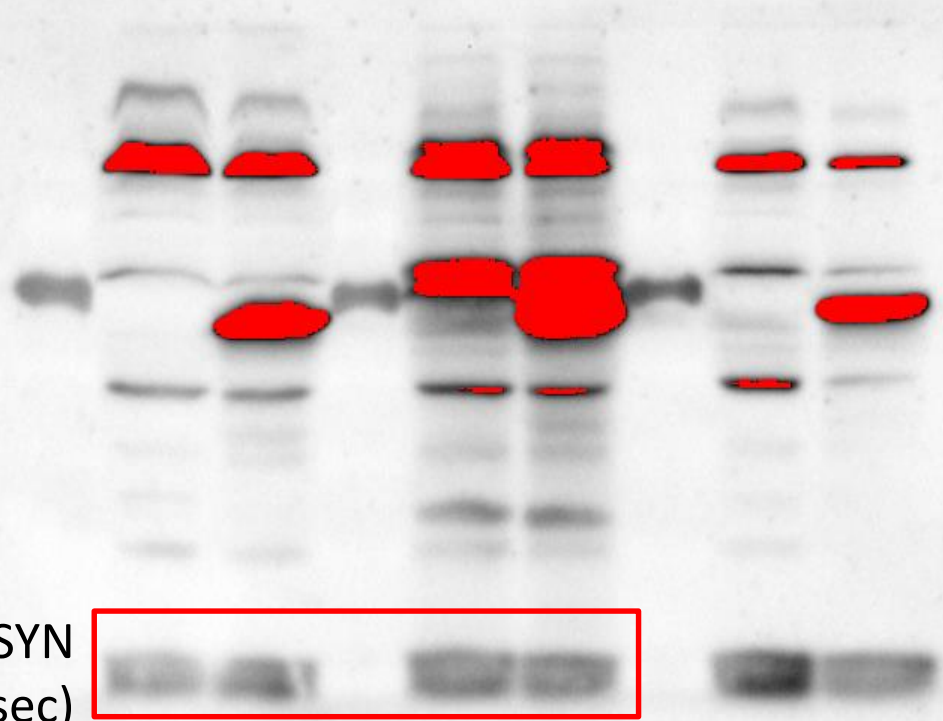

ASYN  
(Exposure 14.0sec)



FIG 3E

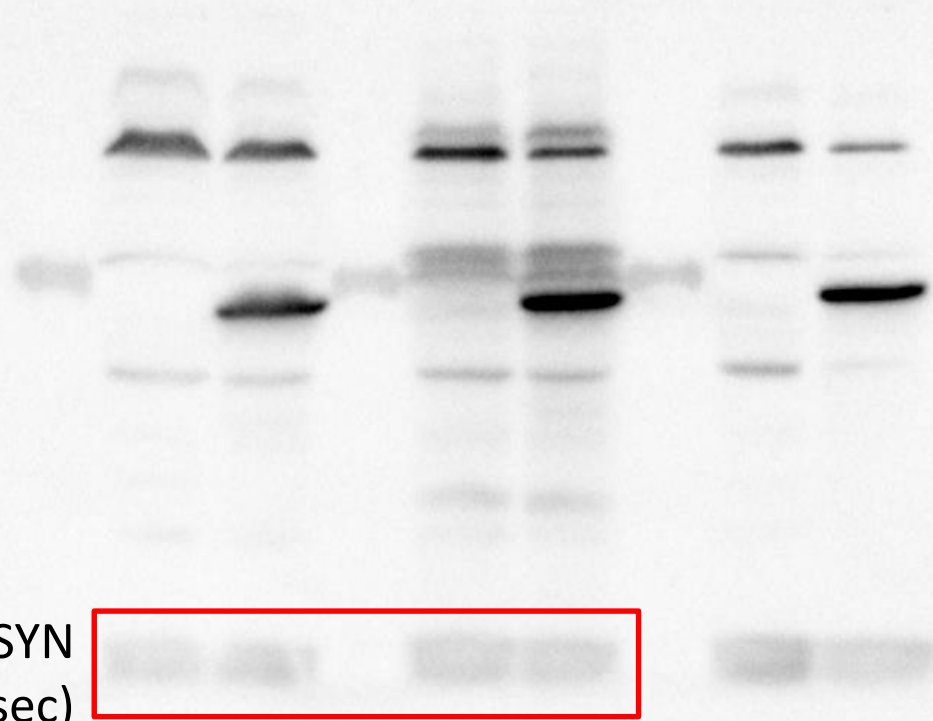

ASYN  
(Exposure 1.0sec)

FIG 5A

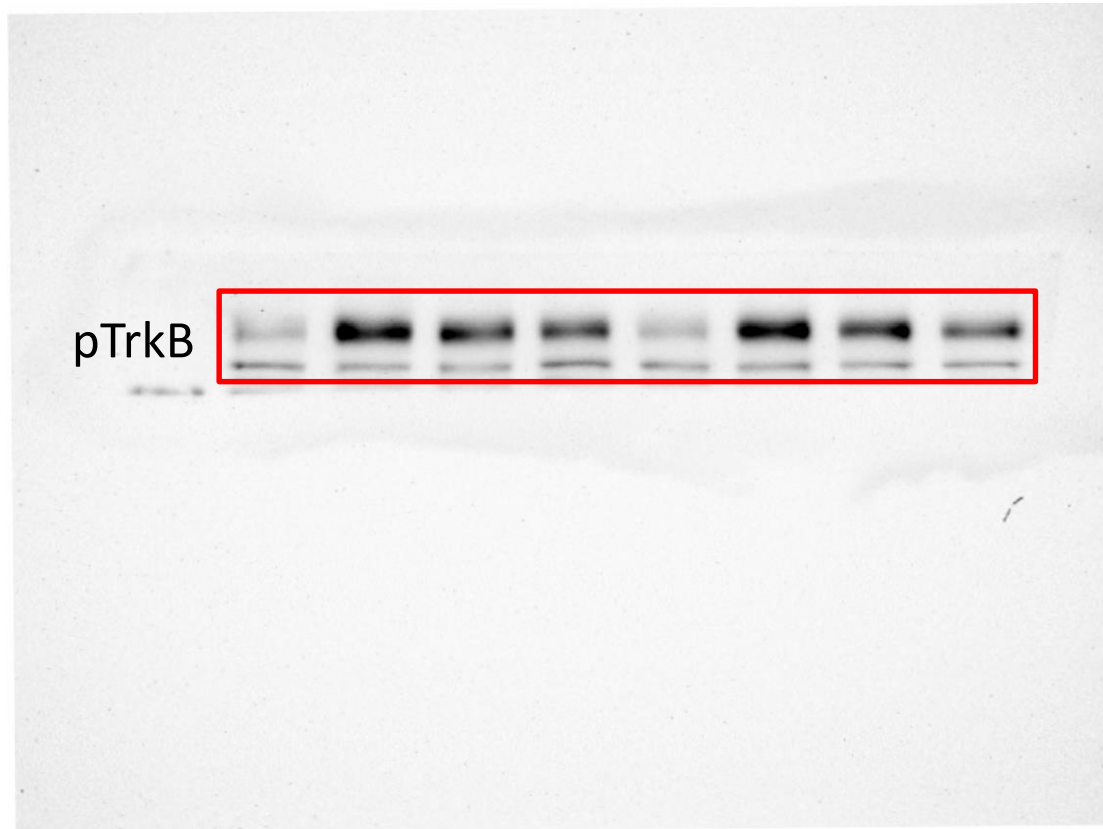

FIG 5A

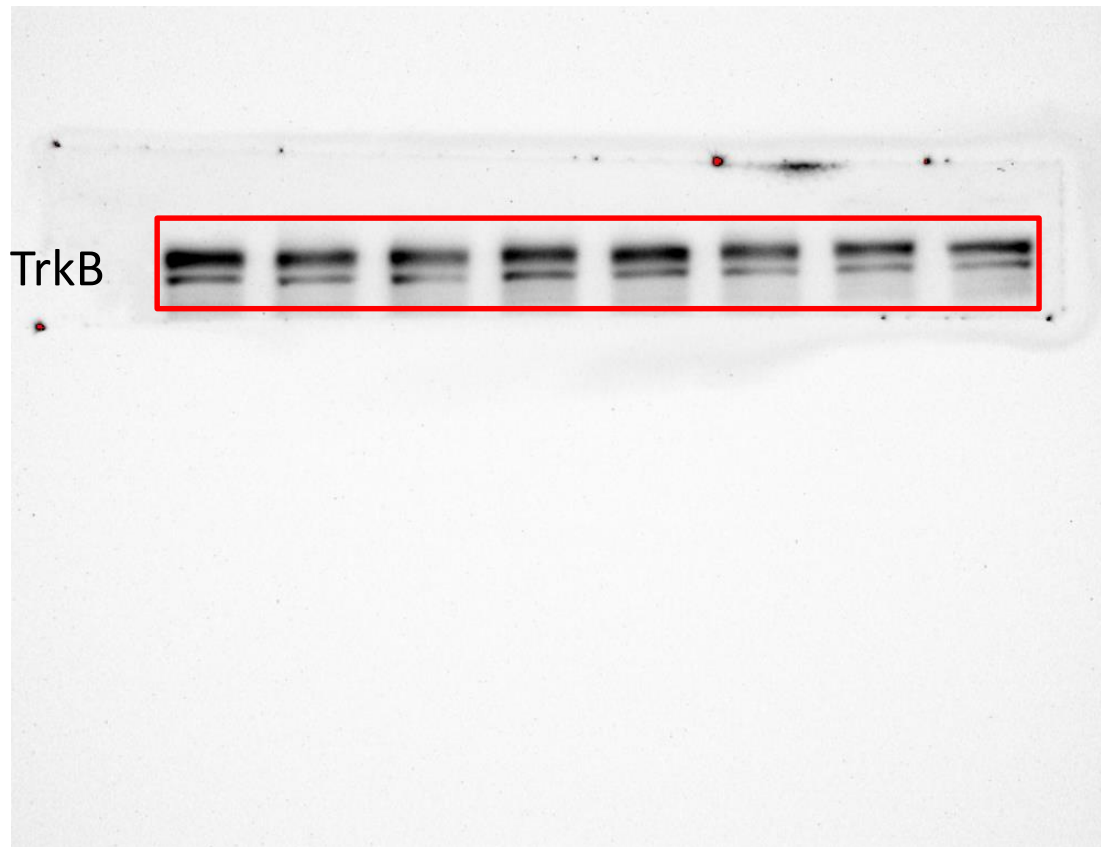

FIG 5A

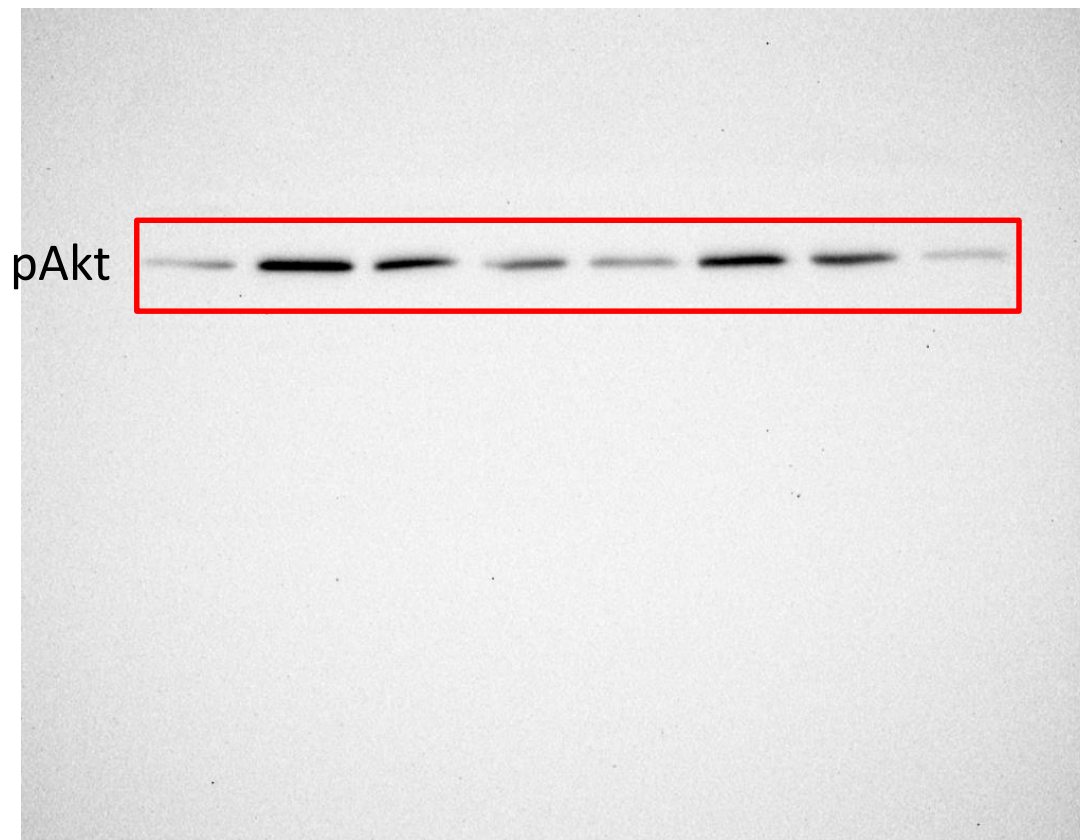

FIG 5A

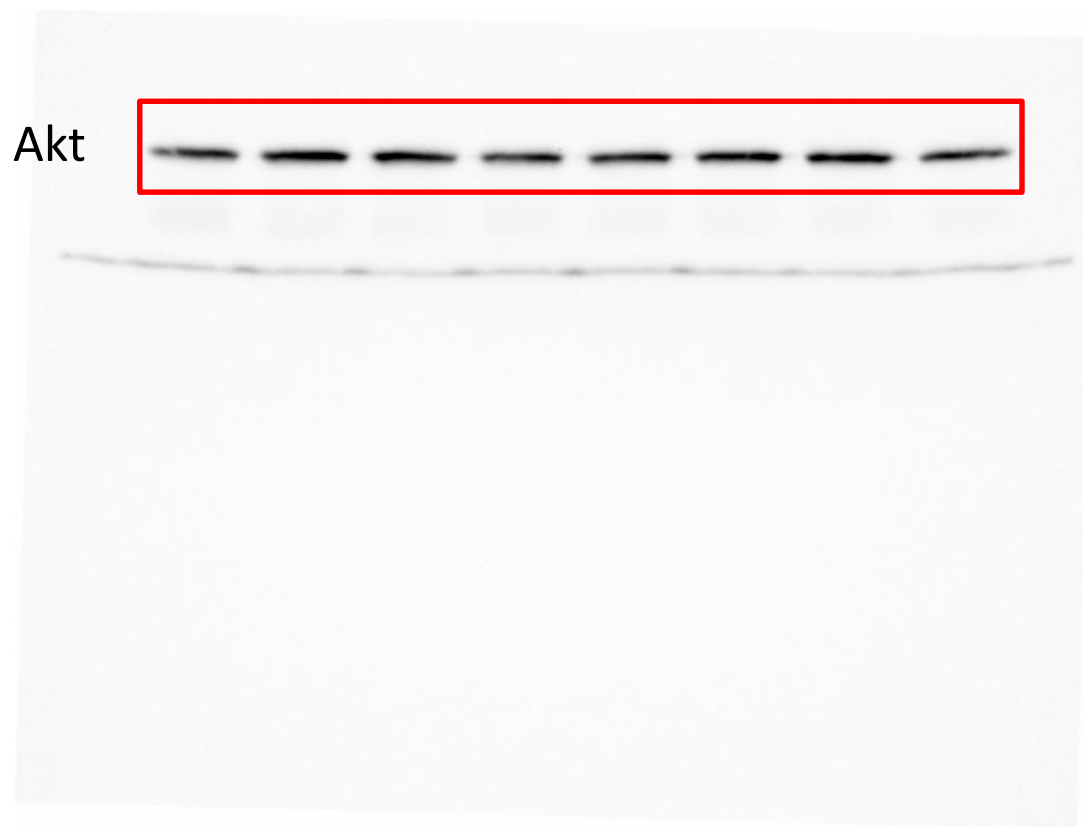

FIG 5A

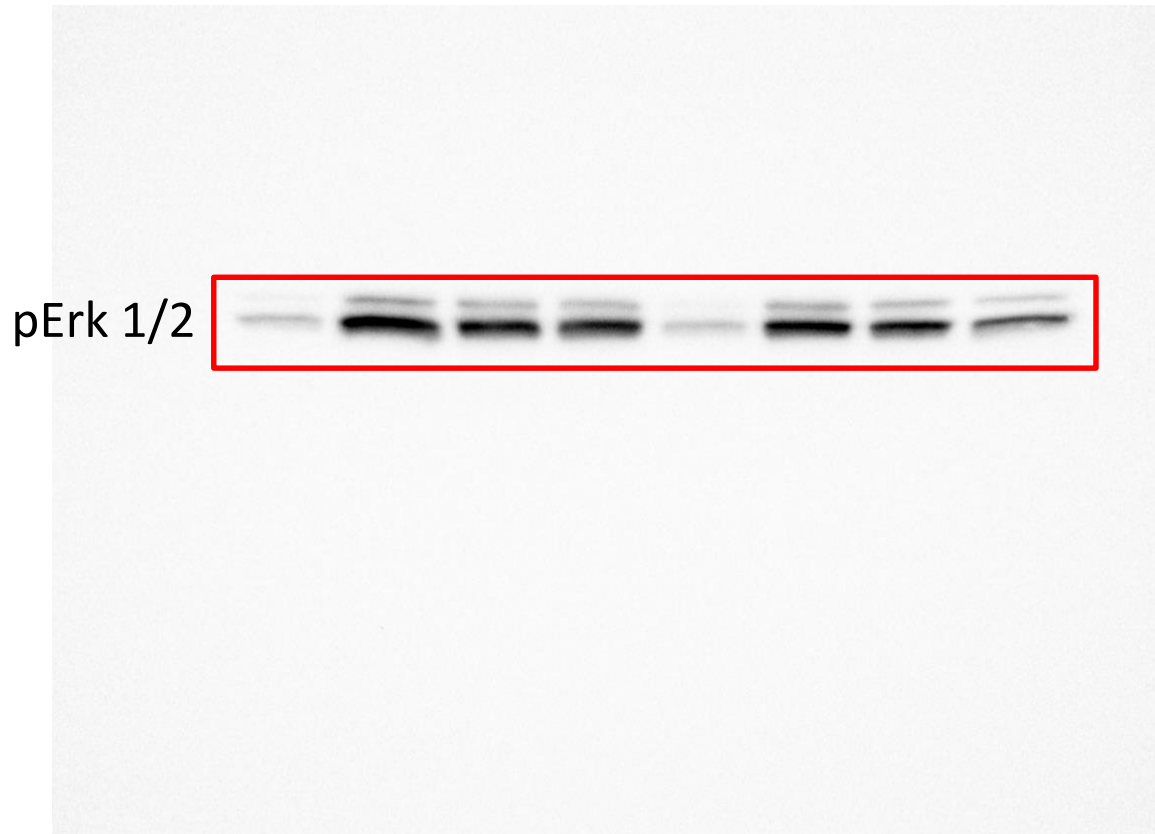

pErk 1/2

FIG 5A

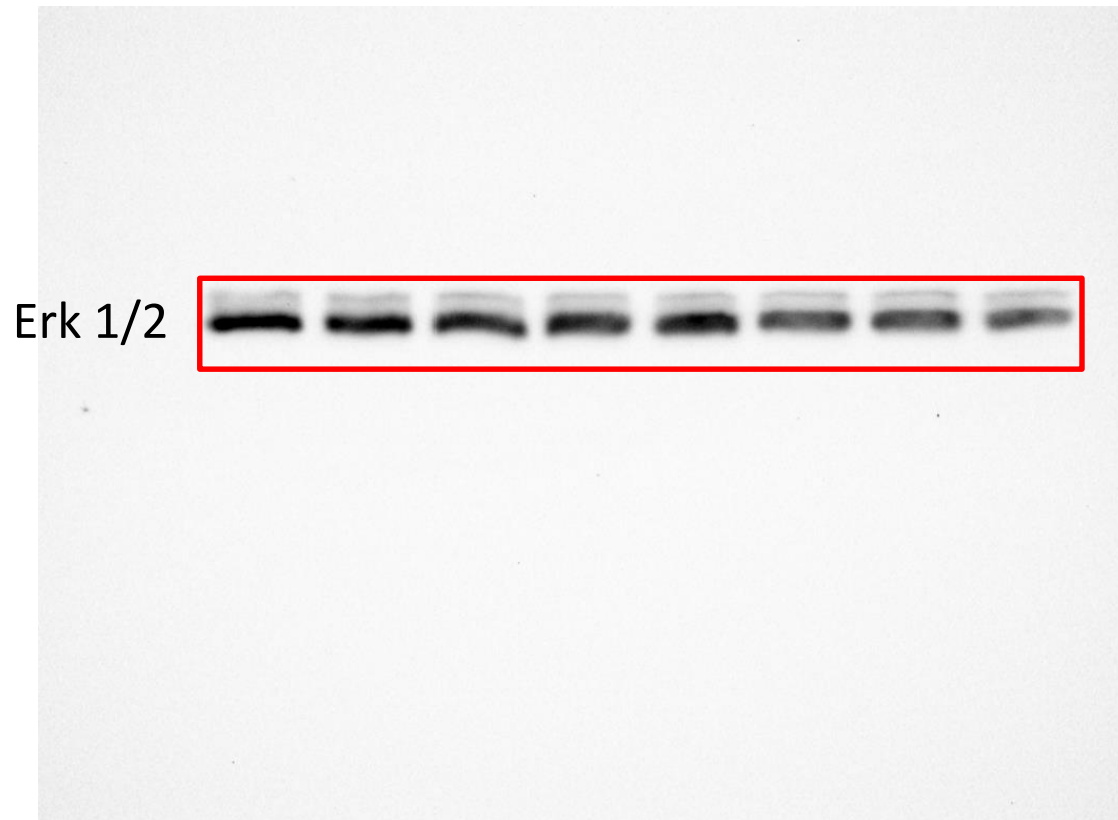

FIG 5A

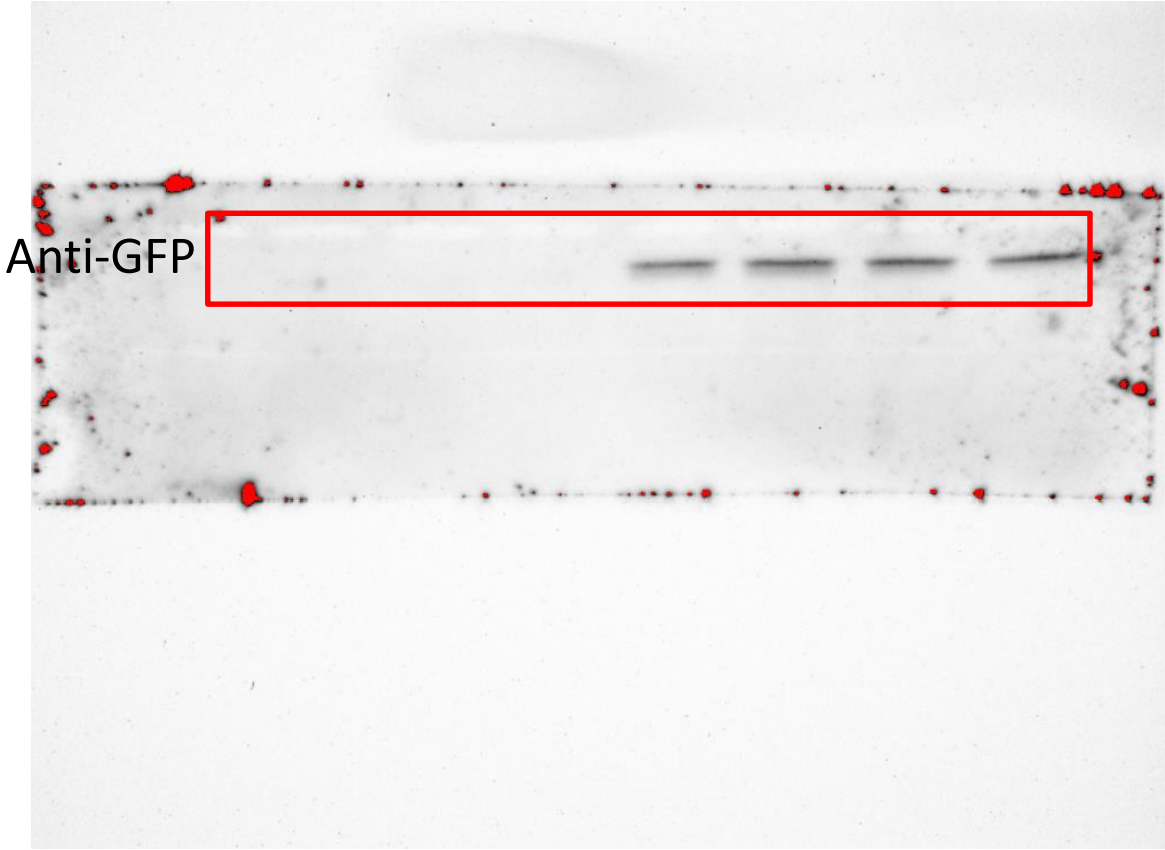



FIG 5A

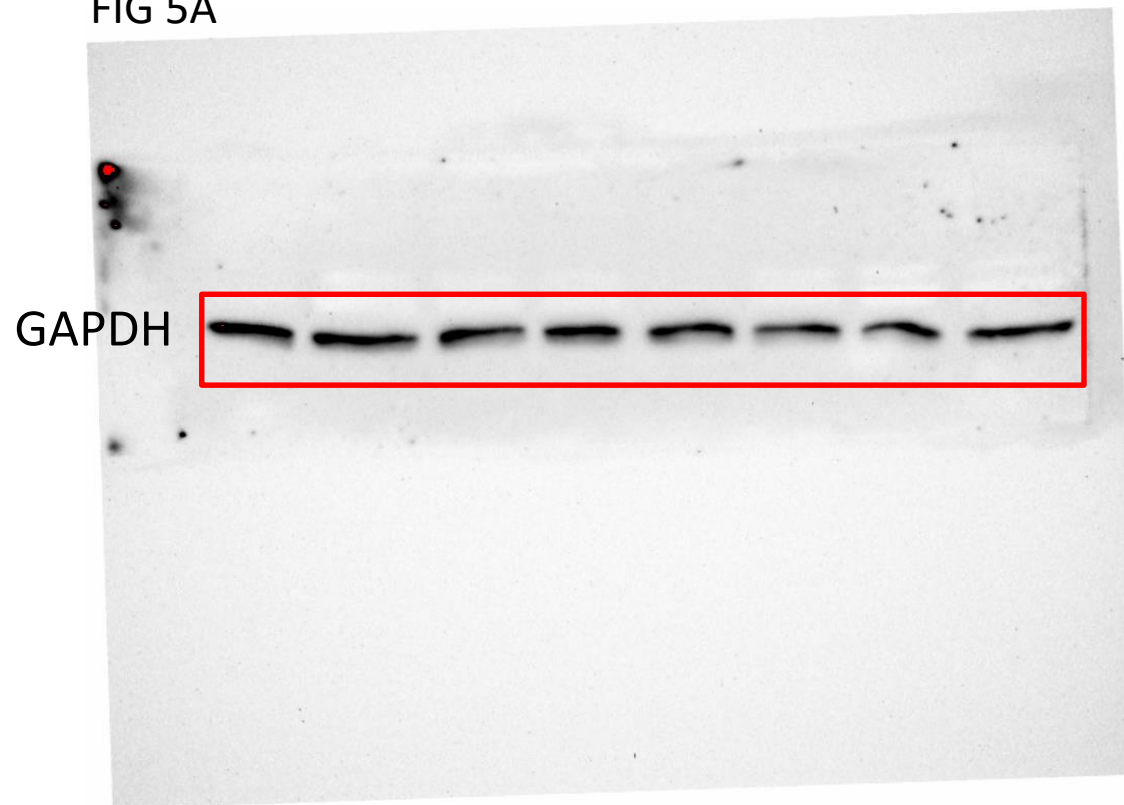

Supplement: 41598_2017_4232_MOESM1_ESM.pdf [file 41598_2017_4232_MOESM1_ESM.pdf]
